# Supplementary material for: Anion-sealed single-molecule capsulesElectronic supplementary information (ESI) available: Experimental details. See http://www.rsc.org/suppdata/cc/b3/b301511d/
Source: Royal Society of Chemistry journal article supplement (doi:10.1039/b301511d), 2003-03-31
Supplement: b301511d.doc [file b301511d.doc]

# J. L. Atwood, A. Szumna

# *Chem. Commun. 2003*

# Supplementary material

Synthesis:

Synthesis of **1** was presented in ref. [14].

**4’-aminobenzanilide**:

To the solution of *p-*nitroaniline (2.76g, 20 mmol) and triethylamine (5ml) in methylene chloride (100 ml) at 0°C, benzoyl chloride (2.35 ml, 22 mmol) was added dropwise. The precipitate forms immediately. Reaction was stirred at rt for 2 h. The precipitate was then recovered by filtration, washed with water and dried to give the first portion of the product. The organic layer was washed with water (3 x 80 ml) and concentrated to ca. half of the initial volume. The precipitate then forms, which was recovered by filtration and washed with water, dried and added to the first portion. Obtained 4’-nitrobenzanilide is a pale yellow crystalline material (3.44 g, yield 71%).

To a suspension of 4’-nitrobenzanilide (2 g, 8.264 mmol) in MeOH (20 ml), Pd/C was added in portions (200 mg, CAUTION! highly explosive). Then the solution of hydrazine (1.5 ml) in 2 ml of MeOH was added dropwise (CAUTION! highly explosive). The mixture was refluxed for 4 h. The catalyst was removed by filtration through celite. The filtrate was collected, evaporated and vacuum dried to give 4’-aminobenzanilide as a yellowish powder (1.75 g, 100%).

1H NMR (acetone-d6, 250 MHz) : 9.19 (1H, *s*, NHamide), 7.96 (2H, *d*, *J =* 6.7Hz), 7.51 (5H, *m*), 6.65 (2H, *d*, *J =* 6.7Hz), 4.48 (2H, *bs*, NH2).

*General procedure**for synthesis of hosts* **2** *and* **3**: To the MeOH:CHCl3 solution (1:1 v/v, 10 ml) of resorcinarene (1 mmol), 4’-aminobenzanilide (750 mg, 5 mmol) and HCHO (1.2 ml, 40% aqua solution, 10 mmol) 1.2 ml of acetic acid was added. The reaction mixture was stirred at rt for 1 week. CHCl3 was then removed by evaporation under reduced pressure at rt and 10 ml of methanol were added. The product precipitates from the solution within minutes. The precipitate was filtered off, washed several times with MeOH and vacuum dried to afford product as a white-pinkish powder.

**2**: yield 83%. 1H NMR (CDCl3, 300 MHz) : 8.06 (4H, *s*, NH), 7.67 (4H, *s*, OH), 7.63 (8H, *d*, *J =* 6.7 Hz, CHar), 7.26 (20H, *m*) 7.02 (4H, *s*, CHar), 6.89 (8H, *d*, *J =* 8.7 Hz, CHar) 5.50 (4H, *d*, *J =* 10.1 Hz, N-CH2-O), 5.25 (4H, *d*, *J =* 10.1 Hz, N-CH2-O), 4.45 (12H, *m*, N-CH2-Car and CH-Car), 1.97 (8H, *m*, CH2-CH), 1.46 (4H, *m*¸ CH), 0.96 ppm (24H, *m*, CH3).

13C NMR (acetone, 75 MHz) *:* 171.1, 149.7, 149.2, 145.3, 136.1, 133.5, 132.0, 129.0, 128.2, 125.1, 124.6, 123.2, 122.2, 118.9, 109.8, 80.6, 47.1, 42.9, 31.3, 26.6, 23.0, 22.9 ppm*.*

ESI MS: [M-C+H]+ 1647 (main peak in the spectrum, compound easily looses CH2 groups from benzoxazine rings).

**3:** yield 84%. 1H NMR (DMSO, 300 MHz) : 10.06 (4H, *s*, NH), 7.90 (8H, *bd*, CHar), 7.71 (4H, *s*, OH), 7.50 (20H, *m*) 7.02 (12H, *m*, CHar), 5.41 (4H, *d*, *J =* 10.2 Hz, N-CH2-O), 5.25 (4H, *d*, *J =* 10.2 Hz, N-CH2-O), 4.40 (8H, *m*, N-CH2-Car), 4.20 (4H, *t*, *J =* 7.6 HZ, CH-Car), 2.06 (8H, *m*, CH2), 0.75 ppm (12H, *m*, CH3).

*Complexes’ preparation* (**2·TMACl, 2·TMABr, 2·TMAI**). *General procedure*: The suspension of host in the methanol solution of respective tetramethylammonium salt was stirred overnight. Then solid product was recovered by filtration.

**2·TMACl:** 1H NMR (CDCl3, 300 MHz) : 9.83 (4H, *s*, NH), 8.41 (8H, *d*, *J =* 7.2 Hz, CHar), 7.91 (4H, *s*, OH), 7.32 (20H, *m*), 6.98 (4H, *s*, CHar), 6.95 (8H, *d*, *J =* 5.7 Hz, CHar) 5.76 (4H, *d*, *J =* 10.9 Hz, N-CH2-O), 5.23 (4H, *d*, *J =* 10.9 Hz, N-CH2-O), 4.54 (8H, *m*, N-CH2-Car), 4.33 (4H, *t*, *J =* 7.7 Hz, CH-Car) 1.98 (8H, *m*, CH2-CH), 1.42 (4H, *m*¸ CH), 0.96 (24H, *d*, *J =* 6.1 Hz, CH3), -0.52 (12H, *s*, N(CH3)4) ppm.

**2·TMABr:** 1H NMR (CDCl3, 300 MHz) : 9.46 (4H, *s*, NH), 8.24 (8H, *m*, CHar), 7.85 (4H, *s*, OH), 7.40 (12H, *m*), 7.31 (8H, *d*, *J =* 8.7 Hz, CHar) 6.94 (8H, *d*, *J =* 8.7 Hz, CHar), 6.92 (4H, *s*, CHar), 5.76 (4H, *d*, *J =* 10.9 Hz, N-CH2-O), 5.21 (4H, *d*, *J =* 10.9 Hz, N-CH2-O), 4.50 (8H, *ab*, N-CH2-Car), 4.33 (4H, *t*, *J =* 7.7 Hz, CH-Car) 1.98 (8H, *m*, CH2-CH), 1.42 (4H, *m*¸ CH), 0.96 (24H, *m*, CH3), -0.51 (12H, *s*, N(CH3)4) ppm.

**2·TMAI:** 1H NMR (CDCl3, 300 MHz) : 9.07 (4H, *s*, NH), 8.13 (8H, *m*, CHar), 7.86 (4H, *s*, OH), 7.51 (12H, *m*), 7.38 (8H, *d*, *J =* 8.7 Hz, CHar) 6.93 (8H, *d*, *J =* 8.7 Hz, CHar), 6.92 (4H, *s*, CHar), 5.76 (4H, *d*, *J =* 10.9 Hz, N-CH2-O), 5.19 (4H, *d*, *J =* 10.9 Hz, N-CH2-O), 4.63 (8H, *d*, *J =* 17.8 Hz, N-CH2-Car), 4.37 (8H, *d*, *J =* 17.8 Hz, N-CH2-Car), 4.35 (4H, *t*, *J =* 7.7 Hz, CH-Car) 1.98 (8H, *m*, CH2-CH), 1.42 (4H, *m*¸ CH), 0.96 (24H, *m*, CH3), -0.47 (12H, *s*, N(CH3)4) ppm.

Titration experiments

All compounds were pre-dried prior to experiments. During the experiments solutions were stored under nitrogen. **2·TMAI** (ca. 3 mM solution in CDCl3) was titrated with aliquots of respective (*n*Bu)4NX (ca. 40 mM solutions in CDCl3). Usually, 15 data points were recorded. Chemical shift changes for the signals of host’s amide hydrogens and/or aromatic protons were used for the calculation of relative association constants. The CurveExpert computer program was used for curve fitting to the following equation:

*K*

*HTMA+I- + X-  HTMA+X- + I-*

*
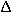

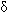
x=
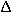

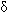
max*{ [ (1+H0/Gx)-(sqrt( (1+H0/Gx)^2 +4*(1/K-1)*( H0/Gx)) ] /*

*[2*(1-1/K)] }*

where *
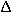

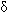
x*= chemical shift change at given point (ppm), *H0* = total concentration of host (HTMA+I-, mol dm-3), *Gx* = total concentration of guest at the given point (TBAX, mol dm-3), *K* = association constant (parameter, mol-1 dm3), *
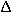

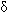
max* = maximum chemical shift change (parameter, ppm).
